# Supplementary material for: Mutual Influence of Some Flavonoids and Classical Nonionic Surfactants on Their Adsorption and Volumetric Properties at Different Temperatures
Source: Molecules. 2022 Apr 29;27(9):2842. doi: 10.3390/molecules27092842 (PMC9099528; doi:10.3390/molecules27092842)
Supplement: Supplementary file 1 [file molecules-27-02842-s001.zip › molecules-1702348-supplementary.pdf]

*Supplementary Materials*

# **Mutual Influence of Some Flavonoids and Classical Nonionic Surfactants on Their Adsorption and Volumetric Properties at Different Temperatures**

**Anna Taraba <sup>1</sup>, Katarzyna Szymczyk <sup>1,\*</sup>, Anna Zdziennicka <sup>1</sup> and Bronisław Jańczuk <sup>1</sup>**

Department of Interfacial Phenomena, Institute of Chemical Sciences, Faculty of Chemistry,  
Maria Curie-Skłodowska University in Lublin, Maria Curie-Skłodowska Sq. 3,  
20-031 Lublin, Poland

\* Correspondence: [katarzyna.szymczyk@mail.umcs.pl](mailto:katarzyna.szymczyk@mail.umcs.pl); Tel.: +48-81-537-55-38

**Table S1.** The values of the contact angle ( $^{\circ}$ ) measured on the quercetin and rutin layer formed on PTFE surface for water, formamide and diiodomethane.

|                  | Water | Formamide | Diiodomethane |
|------------------|-------|-----------|---------------|
| <b>Quercetin</b> | 69.8  | 53.3      | 45.9          |
| <b>Rutin</b>     | 66.1  | 50.2      | 43.1          |

**Table S2.** The values of the critical micelle concentration, CMC (M), for the flavonoid + TX114 and flavonoid + T80 mixtures at the temperature equal to 293, 303 and 313 K.

|                                         | T=293 K                | T=303 K                | T=313 K                                 | T=293 K                | T=303 K                | T=313 K                |
|-----------------------------------------|------------------------|------------------------|-----------------------------------------|------------------------|------------------------|------------------------|
| Q+TX114, $C_Q = 1 \times 10^{-5}$ M     |                        |                        | Q+TX114, $C_Q = 1 \times 10^{-4}$ M     |                        |                        |                        |
| CMC (1)                                 | $1.995 \times 10^{-4}$ | $1.950 \times 10^{-4}$ | $1.851 \times 10^{-4}$                  | $1.905 \times 10^{-4}$ | $1.796 \times 10^{-4}$ | $1.683 \times 10^{-4}$ |
| CMC (2)                                 | $7.968 \times 10^{-4}$ | $9.35 \times 10^{-4}$  | $9.754 \times 10^{-4}$                  | $1.269 \times 10^{-3}$ | $1.116 \times 10^{-3}$ | $1.086 \times 10^{-3}$ |
| CMC (3)                                 | $7.360 \times 10^{-5}$ | $7.755 \times 10^{-5}$ | $8.549 \times 10^{-5}$                  | $2.024 \times 10^{-4}$ | $1.985 \times 10^{-4}$ | $1.970 \times 10^{-4}$ |
| Q+T80, $C_Q = 1 \times 10^{-5}$ M       |                        |                        | Q+T80, $C_Q = 1 \times 10^{-4}$ M       |                        |                        |                        |
| CMC (1)                                 | $3.890 \times 10^{-5}$ | $3.548 \times 10^{-5}$ | $4.078 \times 10^{-5}$                  | $7.079 \times 10^{-5}$ | $5.623 \times 10^{-5}$ | $5.495 \times 10^{-5}$ |
| CMC (2)                                 | $9.234 \times 10^{-4}$ | $1.056 \times 10^{-3}$ | $1.147 \times 10^{-3}$                  | $1.118 \times 10^{-3}$ | $1.147 \times 10^{-3}$ | $1.179 \times 10^{-3}$ |
| CMC (3)                                 | $6.797 \times 10^{-5}$ | $7.736 \times 10^{-5}$ | $8.568 \times 10^{-5}$                  | $1.626 \times 10^{-4}$ | $1.696 \times 10^{-4}$ | $1.765 \times 10^{-4}$ |
| Ru+TX114, $C_{Ru} = 1 \times 10^{-5}$ M |                        |                        | Ru+TX114, $C_{Ru} = 1 \times 10^{-4}$ M |                        |                        |                        |
| CMC (1)                                 | $2 \times 10^{-4}$     | $2 \times 10^{-4}$     | $2 \times 10^{-4}$                      | $2.754 \times 10^{-4}$ | $2.692 \times 10^{-4}$ | $2.428 \times 10^{-4}$ |
| CMC (2)                                 | $1.335 \times 10^{-3}$ | $1.312 \times 10^{-3}$ | $1.288 \times 10^{-3}$                  | $1.088 \times 10^{-3}$ | $8.913 \times 10^{-4}$ | $8.153 \times 10^{-4}$ |
| CMC (3)                                 | $6.628 \times 10^{-5}$ | $7.251 \times 10^{-5}$ | $7.892 \times 10^{-5}$                  | $1.989 \times 10^{-4}$ | $1.865 \times 10^{-4}$ | $1.585 \times 10^{-4}$ |
| Ru+T80, $C_{Ru} = 1 \times 10^{-5}$ M   |                        |                        | Ru+T80, $C_{Ru} = 1 \times 10^{-4}$ M   |                        |                        |                        |
| CMC (1)                                 | $1.446 \times 10^{-4}$ | $7.508 \times 10^{-5}$ | $6.918 \times 10^{-5}$                  | $1.698 \times 10^{-4}$ | $1.622 \times 10^{-4}$ | $1.445 \times 10^{-4}$ |
| CMC (2)                                 | $8.851 \times 10^{-4}$ | $9.009 \times 10^{-4}$ | $1.116 \times 10^{-3}$                  | $7.125 \times 10^{-4}$ | $6.745 \times 10^{-4}$ | $6.602 \times 10^{-4}$ |
| CMC (3)                                 | $7.616 \times 10^{-5}$ | $7.693 \times 10^{-5}$ | $7.912 \times 10^{-5}$                  | $1.605 \times 10^{-4}$ | $1.783 \times 10^{-4}$ | $1.743 \times 10^{-4}$ |

Symbols 1 and 2 correspond to the CMC values determined based on the surface tension and conductivity isotherms, respectively. Symbol 3 corresponds to the CMC values obtained based on the crossing point on the curves of the mole fraction of the TX114 or T80 in the mixed monolayer at the water-air interface with the curves of the mole fraction of a given surfactant in the bulk phase.

**Table S3.** The values of the standard Gibbs free energy of adsorption ( $\Delta G_{ads}^0$ ) for the flavonoid + TX114 and flavonoid + T80 mixtures at the water-air interface at the temperature equal to 293, 303 and 313 K.

|                       | T=293 K                                                   | T=303 K | T=313 K | T=293 K                                                   | T=303 K | T=313 K |
|-----------------------|-----------------------------------------------------------|---------|---------|-----------------------------------------------------------|---------|---------|
|                       | <b>Q+TX114, <math>C_Q = 1 \times 10^{-5}</math> M</b>     |         |         | <b>Q+TX114, <math>C_Q = 1 \times 10^{-4}</math> M</b>     |         |         |
| $\Delta G_{ads}^0(1)$ | -45.38                                                    | -46.77  | -48.34  | -45.98                                                    | -47.54  | -48.56  |
| $\Delta G_{ads}^0(2)$ | -42.01                                                    | -42.82  | -44.02  | -41.36                                                    | -42.84  | -43.71  |
| $\Delta G_{ads}^0(3)$ | -47.81                                                    | -49.09  | -50.35  | -45.83                                                    | -47.29  | -48.15  |
| $\Delta G_{ads}^0(4)$ | -45.23                                                    | -46.77  | -48.31  | -38.08                                                    | -39.08  | -40.43  |
|                       | <b>Q+T80, <math>C_Q = 1 \times 10^{-5}</math> M</b>       |         |         | <b>Q+T80, <math>C_Q = 1 \times 10^{-4}</math> M</b>       |         |         |
| $\Delta G_{ads}^0(1)$ | -49.02                                                    | -50.50  | -53.17  | -55.02                                                    | -59.87  | -63.17  |
| $\Delta G_{ads}^0(2)$ | -41.30                                                    | -41.95  | -44.48  | -48.17                                                    | -52.27  | -55.19  |
| $\Delta G_{ads}^0(3)$ | -47.66                                                    | -48.53  | -51.23  | -53.00                                                    | -57.09  | -60.13  |
| $\Delta G_{ads}^0(4)$ | -45.49                                                    | -47.03  | -48.58  | -39.33                                                    | -40.66  | -43.12  |
|                       | <b>Ru+TX114, <math>C_{Ru} = 1 \times 10^{-5}</math> M</b> |         |         | <b>Ru+TX114, <math>C_{Ru} = 1 \times 10^{-4}</math> M</b> |         |         |
| $\Delta G_{ads}^0(1)$ | -45.78                                                    | -47.06  | -48.29  | -46.3                                                     | -47.31  | -49.13  |
| $\Delta G_{ads}^0(2)$ | -41.16                                                    | -42.32  | -43.45  | -42.95                                                    | -44.29  | -45.98  |
| $\Delta G_{ads}^0(3)$ | -48.48                                                    | -49.61  | -50.71  | -47.09                                                    | -48.23  | -50.24  |
| $\Delta G_{ads}^0(4)$ | -45.73                                                    | -47.28  | -48.84  | -36.26                                                    | -37.24  | -38.46  |
|                       | <b>Ru+T80, <math>C_{Ru} = 1 \times 10^{-5}</math> M</b>   |         |         | <b>Ru+T80, <math>C_{Ru} = 1 \times 10^{-4}</math> M</b>   |         |         |
| $\Delta G_{ads}^0(1)$ | -50.67                                                    | -53.16  | -55.33  | -59.58                                                    | -63.01  | -68.19  |
| $\Delta G_{ads}^0(2)$ | -46.26                                                    | -46.90  | -47.99  | -56.09                                                    | -59.42  | -64.24  |
| $\Delta G_{ads}^0(3)$ | -52.23                                                    | -53.10  | -54.98  | -59.72                                                    | -62.78  | -67.70  |
| $\Delta G_{ads}^0(4)$ | -46.36                                                    | -47.94  | -49.18  | -40.96                                                    | -42.65  | -44.32  |

Symbols 1, 2 and 3 corresponds to the  $\Delta G_{ads}^0$  values determined from Eq. (13) taking in account the CMC (1), CMC (2) and CMC (3) values, respectively (Table S2).  $\Delta G_{ads}^0(4)$  – the values calculated from Eq. (12).

**Table S4.** The values of the standard Gibbs free energy of micellization ( $\Delta G_{mic}^0$ ) for the flavonoid + TX114 and flavonoid + T80 mixtures at the water-air interface at the temperature equal to 293, 303 and 313 K.

|                       | T=293 K                                 | T=303 K | T=313 K | T=293 K                                 | T=303 K | T=313 K |
|-----------------------|-----------------------------------------|---------|---------|-----------------------------------------|---------|---------|
|                       | Q+TX114, $C_Q = 1 \times 10^{-5}$ M     |         |         | Q+TX114, $C_Q = 1 \times 10^{-4}$ M     |         |         |
| $\Delta G_{mic}^0(1)$ | -30.54                                  | -31.63  | -32.80  | -30.65                                  | -31.84  | -33.05  |
| $\Delta G_{mic}^0(2)$ | -27.16                                  | -27.68  | -28.47  | -26.06                                  | -27.23  | -28.19  |
| $\Delta G_{mic}^0(3)$ | -32.96                                  | -33.95  | -34.81  | -30.50                                  | -31.58  | -32.64  |
|                       | Q+T80, $C_Q = 1 \times 10^{-5}$ M       |         |         | Q+T80, $C_Q = 1 \times 10^{-4}$ M       |         |         |
| $\Delta G_{mic}^0(1)$ | -34.52                                  | -35.92  | -36.73  | -33.06                                  | -34.76  | -35.96  |
| $\Delta G_{mic}^0(2)$ | -26.80                                  | -27.37  | -28.05  | -26.34                                  | -27.16  | -27.98  |
| $\Delta G_{mic}^0(3)$ | -33.16                                  | -33.96  | -34.80  | -31.03                                  | -31.98  | -32.92  |
|                       | Ru+TX114, $C_{Ru} = 1 \times 10^{-5}$ M |         |         | Ru+TX114, $C_{Ru} = 1 \times 10^{-4}$ M |         |         |
| $\Delta G_{mic}^0(1)$ | -30.53                                  | -31.56  | -32.60  | -29.75                                  | -30.82  | -32.09  |
| $\Delta G_{mic}^0(2)$ | -26.150                                 | -26.83  | -27.75  | -26.40                                  | -27.80  | -28.94  |
| $\Delta G_{mic}^0(3)$ | -33.22                                  | -34.12  | -35.02  | -30.54                                  | -31.74  | -33.20  |
|                       | Ru+T80, $C_{Ru} = 1 \times 10^{-5}$ M   |         |         | Ru+T80, $C_{Ru} = 1 \times 10^{-4}$ M   |         |         |
| $\Delta G_{mic}^0(1)$ | -31.32                                  | -34.03  | -35.36  | -30.93                                  | -32.09  | -33.44  |
| $\Delta G_{mic}^0(2)$ | -26.91                                  | -27.77  | -28.12  | -27.34                                  | -28.50  | -29.49  |
| $\Delta G_{mic}^0(3)$ | -32.88                                  | -33.97  | -35.07  | -31.08                                  | -31.85  | -32.96  |

Symbols 1, 2 and 3 corresponds to the  $\Delta G_{mic}^0$  values determined from Eq. (14) taking in account the CMC (1), CMC (2) and CMC (3) values, respectively (Table S2).

**Table S5.** The values of the standard Gibbs free energy of adsorption ( $\Delta G_{ads}^0$ ), the standard enthalpy of adsorption ( $\Delta H_{ads}^0$ ) and the standard entropy of adsorption ( $\Delta S_{ads}^0$ ) for quercetin, rutin, TX114 and T80 at the temperature equal to 293, 303 and 313 K.

|           | Quercetin                    | Rutin  | TX114  | T80    |
|-----------|------------------------------|--------|--------|--------|
|           | $\Delta G_{ads}^0$ (kJ/mol)  |        |        |        |
| T = 293 K | -36.68                       | -36.87 | -43.70 | -32.76 |
| T = 303 K | -37.85                       | -38.07 | -45.36 | -34.66 |
| T = 313 K | -39.01                       | -39.17 | -47.00 | -35.01 |
|           | $\Delta H_{ads}^0$ (kJ/mol)  |        |        |        |
| T = 293 K | -2.55                        | -3.17  | 4.65   | 0.24   |
| T = 303 K | -2.55                        | -3.17  | 4.65   | 0.24   |
| T = 313 K | -2.55                        | -3.17  | 4.65   | 0.24   |
|           | $\Delta S_{ads}^0$ (kJ/molK) |        |        |        |
| T = 293 K | 0.116                        | 0.115  | 0.165  | 0.113  |
| T = 303 K | 0.116                        | 0.115  | 0.165  | 0.113  |
| T = 313 K | 0.116                        | 0.115  | 0.165  | 0.113  |

**Table S6.** The values of the standard enthalpy of adsorption ( $\Delta H_{ads}^0$ ) (kJ/mol) and micellization ( $\Delta H_{mic}^0$ ) (kJ/mol) for the flavonoid + TX114 and flavonoid + T80 mixtures at the water-air interface at the temperature equal to 293, 303 and 313 K.

|                                         | T = 293 K | T = 303 K | T = 313 K                               | T = 293 K | T = 303 K | T = 313 K |
|-----------------------------------------|-----------|-----------|-----------------------------------------|-----------|-----------|-----------|
| Q+TX114, $C_Q = 1 \times 10^{-5}$ M     |           |           | Q+TX114, $C_Q = 1 \times 10^{-4}$ M     |           |           |           |
| $\Delta H_{ads}^0$                      | -0.258    | -0.108    | -0.138                                  | -3.653    | -3.478    | -3.653    |
| $\Delta H_{mic}^0$                      | 2.569     | 2.609     | 2.569                                   | 4.510     | 4.521     | 4.510     |
| Q+T80, $C_Q = 1 \times 10^{-5}$ M       |           |           | Q+T80, $C_Q = 1 \times 10^{-4}$ M       |           |           |           |
| $\Delta H_{ads}^0$                      | -0.222    | -0.217    | -0.222                                  | 16.194    | 16.759    | 16.194    |
| $\Delta H_{mic}^0$                      | -2.144    | -2.439    | -2.144                                  | 9.425     | 9.175     | 9.425     |
| Ru+TX114, $C_{Ru} = 1 \times 10^{-5}$ M |           |           | Ru+TX114, $C_{Ru} = 1 \times 10^{-4}$ M |           |           |           |
| $\Delta H_{ads}^0$                      | -0.169    | -0.164    | -0.169                                  | -4.030    | -3.910    | -4.030    |
| $\Delta H_{mic}^0$                      | -0.205    | -0.200    | -0.205                                  | 4.531     | 4.631     | 4.531     |
| Ru+T80, $C_{Ru} = 1 \times 10^{-5}$ M   |           |           | Ru+T80, $C_{Ru} = 1 \times 10^{-4}$ M   |           |           |           |
| $\Delta H_{ads}^0$                      | -5.047    | -5.217    | -5.047                                  | 8.264     | 8.254     | 8.264     |
| $\Delta H_{mic}^0$                      | 7.649     | 6.269     | 6.269                                   | 5.842     | 5.937     | 5.842     |

**Table S7.** The values of the standard entropy of adsorption ( $\Delta S_{ads}^0$ ) (kJ/molK) and micellization ( $\Delta S_{mic}^0$ ) (kJ/molK) for the flavonoid+TX114 and flavonoid+T80 mixtures at the water-air interface at the temperature equal to 293, 303 and 313 K.

|                    | <b>Q+TX114<br/><math>C_Q = 1 \times 10^{-5}</math> M</b>     | <b>Q+TX114<br/><math>C_Q = 1 \times 10^{-4}</math> M</b>     | <b>Q+T80<br/><math>C_Q = 1 \times 10^{-5}</math> M</b>     | <b>Q+T80<br/><math>C_Q = 1 \times 10^{-4}</math> M</b>     |
|--------------------|--------------------------------------------------------------|--------------------------------------------------------------|------------------------------------------------------------|------------------------------------------------------------|
| $\Delta S_{ads}^0$ | 0.154                                                        | 0.118                                                        | 0.155                                                      | 0.190                                                      |
| $\Delta S_{mic}^0$ | 0.013                                                        | 0.12                                                         | 0.111                                                      | 0.145                                                      |
|                    | <b>Ru+TX114<br/><math>C_{Ru} = 1 \times 10^{-5}</math> M</b> | <b>Ru+TX114<br/><math>C_{Ru} = 1 \times 10^{-4}</math> M</b> | <b>Ru+T80<br/><math>C_{Ru} = 1 \times 10^{-5}</math> M</b> | <b>Ru+T80<br/><math>C_{Ru} = 1 \times 10^{-4}</math> M</b> |
| $\Delta S_{ads}^0$ | 0.156                                                        | 0.110                                                        | 0.141                                                      | 0.168                                                      |
| $\Delta S_{mic}^0$ | 0.104                                                        | 0.117                                                        | 0.133                                                      | 0.126                                                      |

**Table S8.** The literature values of the CMC,  $\Delta G_{mic}^0$  (kJ/mol),  $\Delta H_{mic}^0$  (kJ/mol) and  $\Delta S$  (kJ/molK) for TX114 and T80.

|              | CMC                   | $\Delta G_{mic}^0$ | $\Delta H_{mic}^0$ | $\Delta S_{mic}^0$ | Ref. |
|--------------|-----------------------|--------------------|--------------------|--------------------|------|
| <b>TX114</b> |                       |                    |                    |                    |      |
| T = 293 K    | 1.68x10 <sup>-4</sup> | -30.95             |                    |                    |      |
| T = 303 K    | 1.53x10 <sup>-4</sup> | -32.24             | 6.43               | 0.128              | [24] |
| T = 313 K    | 1.41x10 <sup>-4</sup> | -33.51             |                    |                    |      |
| <b>T80</b>   |                       |                    |                    |                    |      |
| T = 293 K    | 5.74x10 <sup>-4</sup> | -27.96             | 0.75               |                    |      |
| T = 303 K    | 4.41x10 <sup>-4</sup> | -29.57             | 0.12               | 0.098              | [25] |
| T = 313 K    | 4.39x10 <sup>-4</sup> | -30.55             | 0.20               |                    |      |

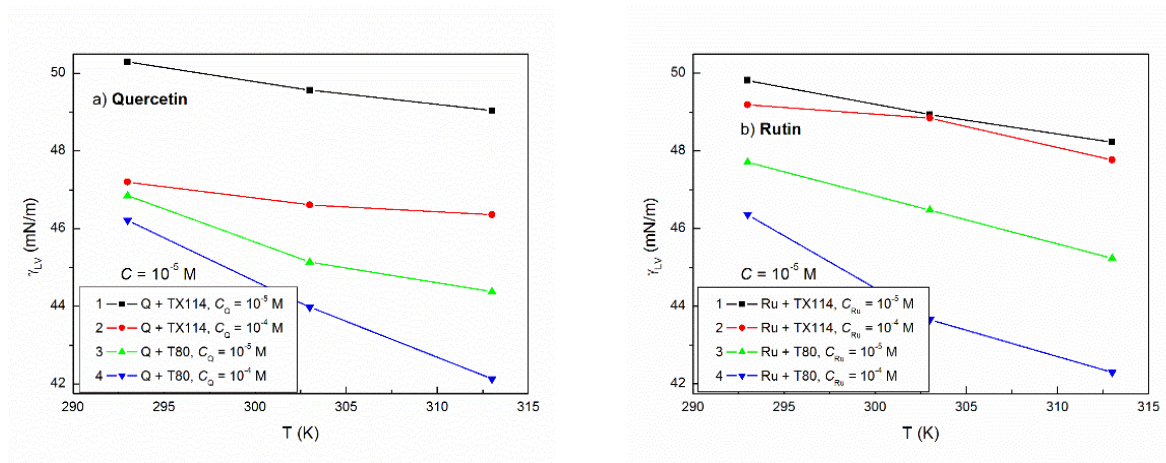

**Figure S1.** A plot of the surface tension ( $\gamma_{LV}$ ) of aqueous solutions of quercetin (a) and rutin (b) with TX114 and T80 ( $C = 10^{-5}$  M) vs. temperature (T). Curves 1 and 3 correspond to  $C_{Q/Ru} = 10^{-5}$  M and curves 2 and 4 correspond to  $C_{Q/Ru} = 10^{-4}$  M, respectively.

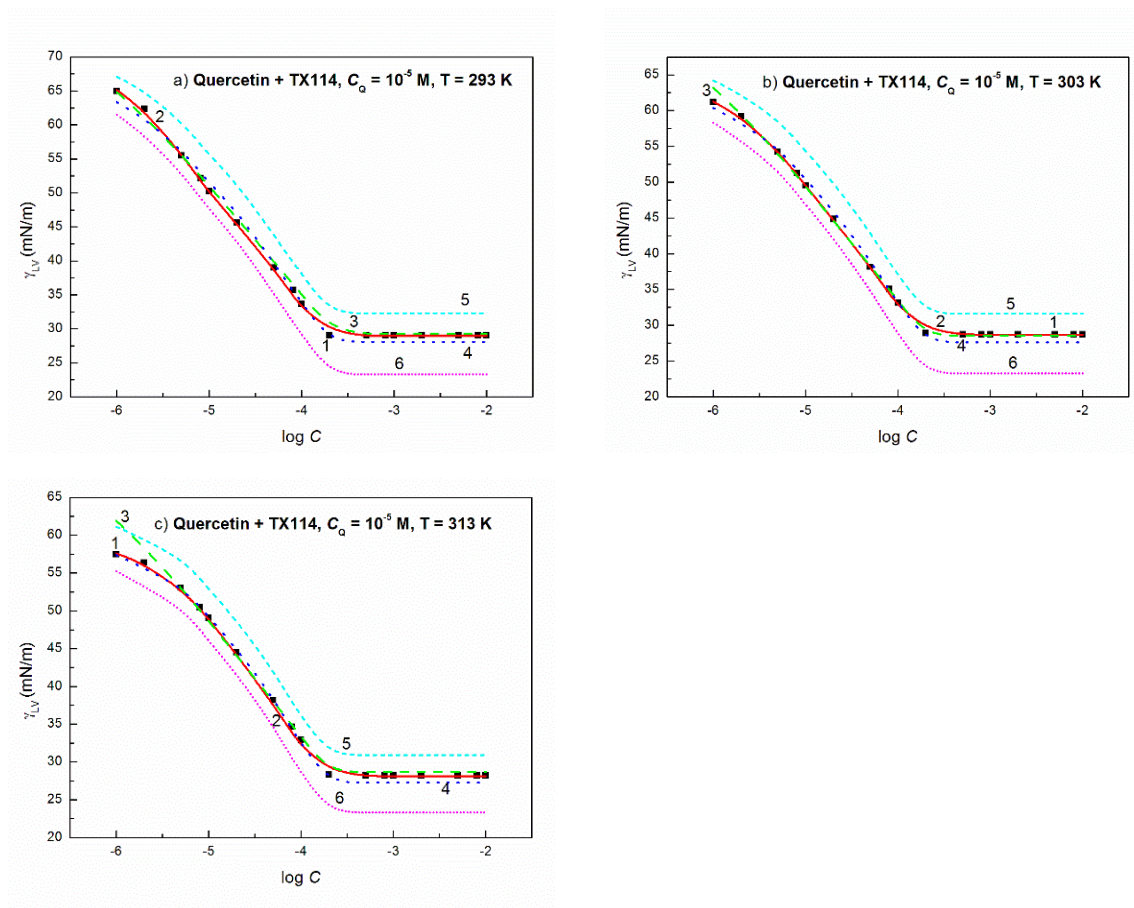

**Figure S2.** A plot of the surface tension ( $\gamma_{LV}$ ) of aqueous solutions of Q + TX114 at the constant Q concentration equal to  $1 \times 10^{-5}$  M vs. the logarithm of TX114 concentration ( $C$ ) at  $T = 293$  K (a),  $303$  K (b) and  $313$  K (c). Points 1 correspond to the measured values. Curves 2, 3, 4, 5 and 6 correspond to the values calculated from Eqs. (4), (2), (6), (7) and independent adsorption, respectively.

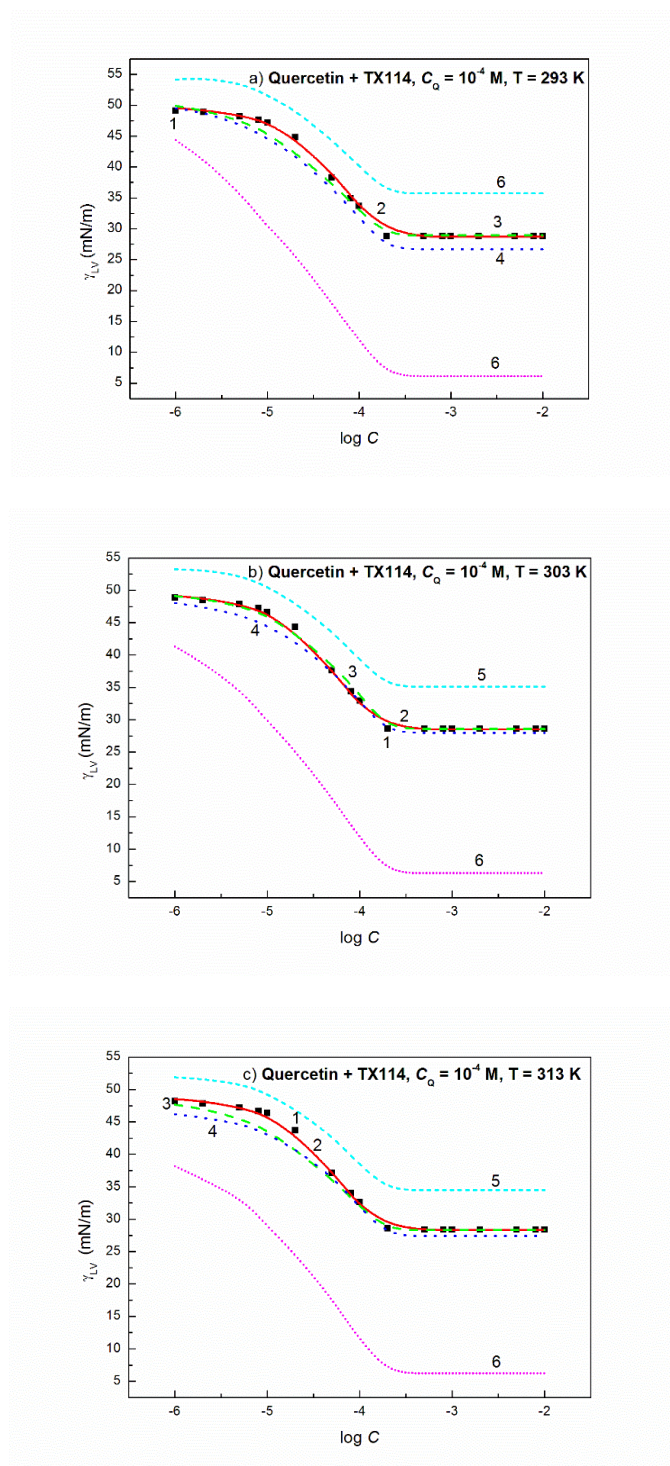

**Figure S3.** A plot of the surface tension ( $\gamma_{LV}$ ) of aqueous solutions of Q + TX114 at the constant Q concentration equal to  $1 \times 10^{-4}$  M vs. the logarithm of TX114 concentration ( $C$ ) at  $T = 293$  K (a),  $303$  K (b) and  $313$  K (c). Points 1 correspond to the measured values. Curves 2, 3, 4, 5 and 6 correspond to the values calculated from Eqs. (4), (2), (6), (7) and independent adsorption, respectively.

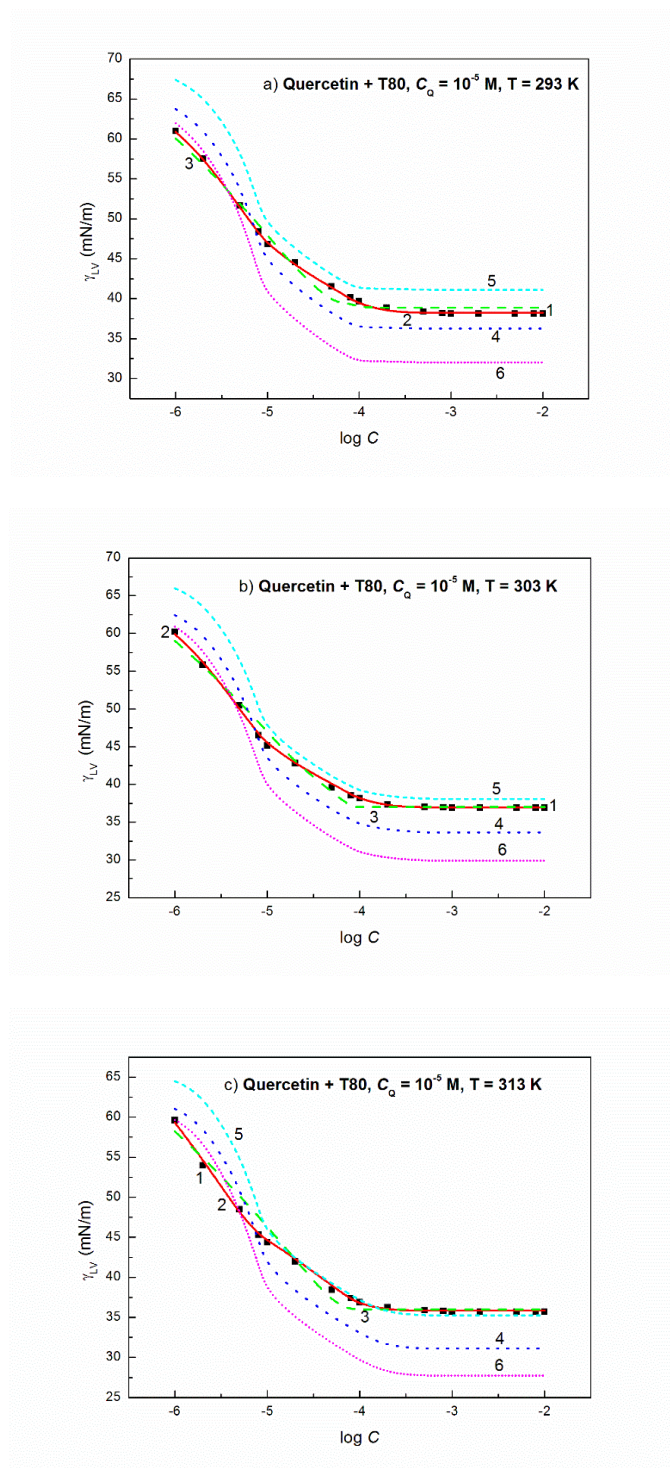

**Figure S4.** A plot of the surface tension ( $\gamma_{LV}$ ) of aqueous solutions of Q + T80 at the constant Q concentration equal to  $1 \times 10^{-5}$  M vs. the logarithm of T80 concentration ( $C$ ) at  $T = 293$  K (a),  $303$  K (b) and  $313$  K (c). Points 1 correspond to the measured values. Curves 2, 3, 4, 5 and 6 correspond to the values calculated from Eqs. (4), (2), (6), (7) and independent adsorption, respectively.

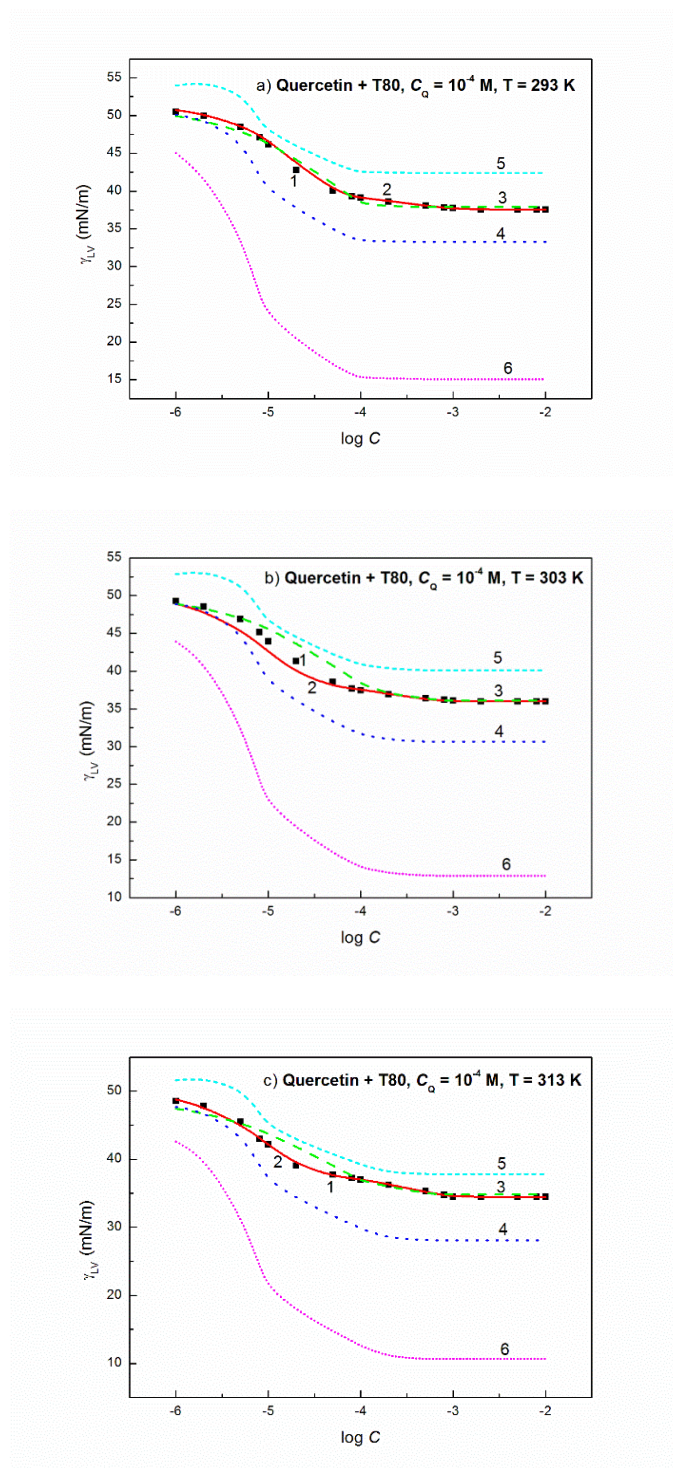

**Figure S5.** A plot of the surface tension ( $\gamma_{LV}$ ) of aqueous solutions of Q + T80 at the constant Q concentration equal to  $1 \times 10^{-4}$  M vs. the logarithm of T80 concentration ( $C$ ) at  $T = 293$  K (a),  $303$  K (b) and  $313$  K (c). Points 1 correspond to the measured values. Curves 2, 3, 4, 5 and 6 correspond to the values calculated from Eqs. (4), (2), (6), (7) and independent adsorption, respectively.

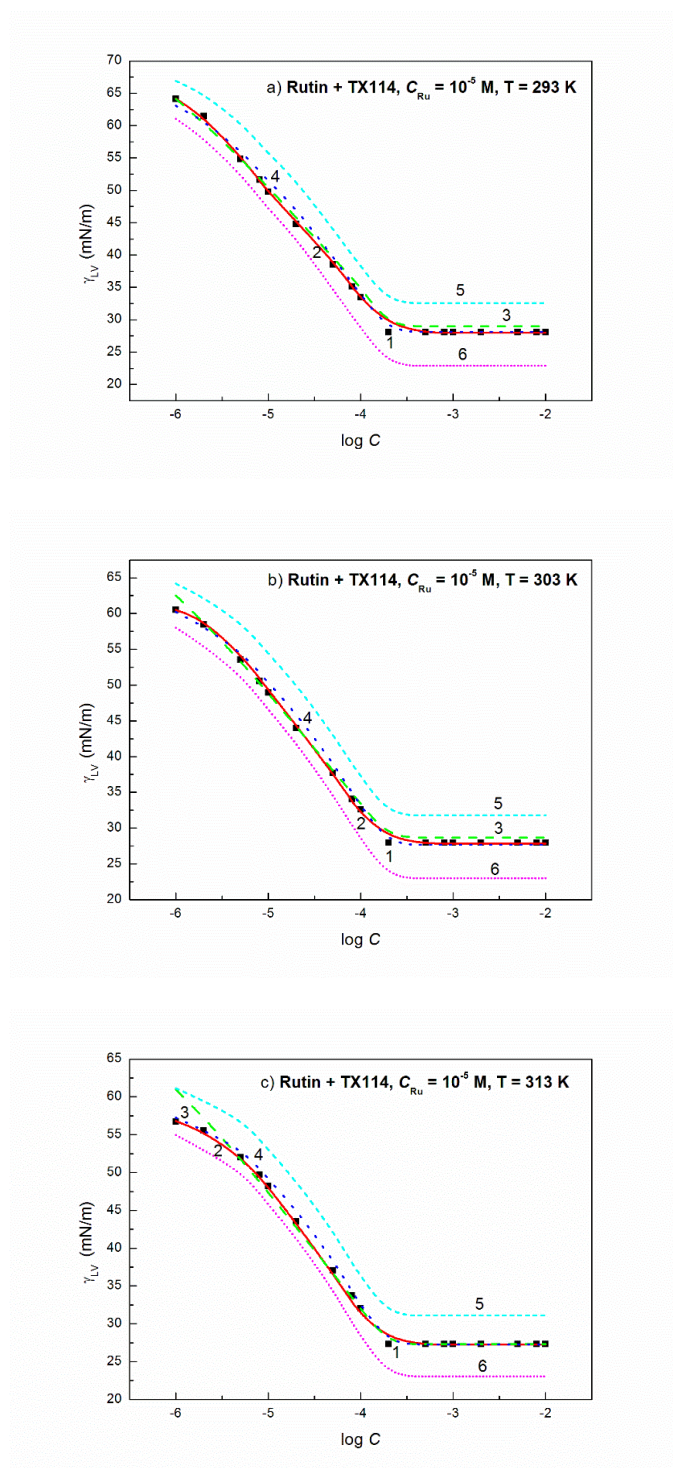

**Figure S6.** A plot of the surface tension ( $\gamma_{LV}$ ) of aqueous solutions of Ru + TX114 at the constant Ru concentration equal to  $1 \times 10^{-5}$  M vs. the logarithm of TX114 concentration ( $C$ ) at  $T = 293$  K (a),  $303$  K (b) and  $313$  K (c). Points 1 correspond to the measured values. Curves 2, 3, 4, 5 and 6 correspond to the values calculated from Eqs. (4), (2), (6), (7) and independent adsorption, respectively.

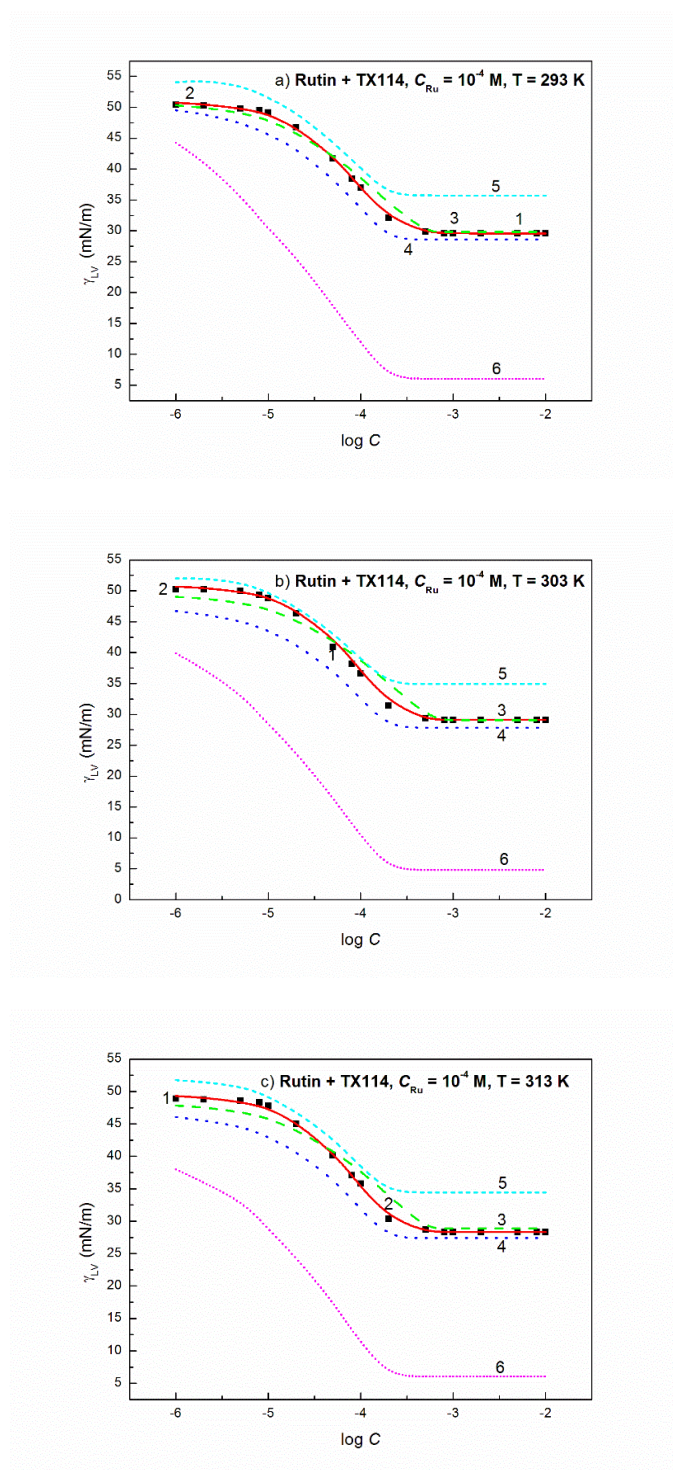

**Figure S7.** A plot of the surface tension ( $\gamma_{LV}$ ) of aqueous solutions of Ru + TX114 at the constant Ru concentration equal to  $1 \times 10^{-4}$  M vs. the logarithm of TX114 concentration ( $C$ ) at  $T = 293$  K (a),  $303$  K (b) and  $313$  K (c). Points 1 correspond to the measured values. Curves 2, 3, 4, 5 and 6 correspond to the values calculated from Eqs. (4), (2), (6), (7) and independent adsorption, respectively.

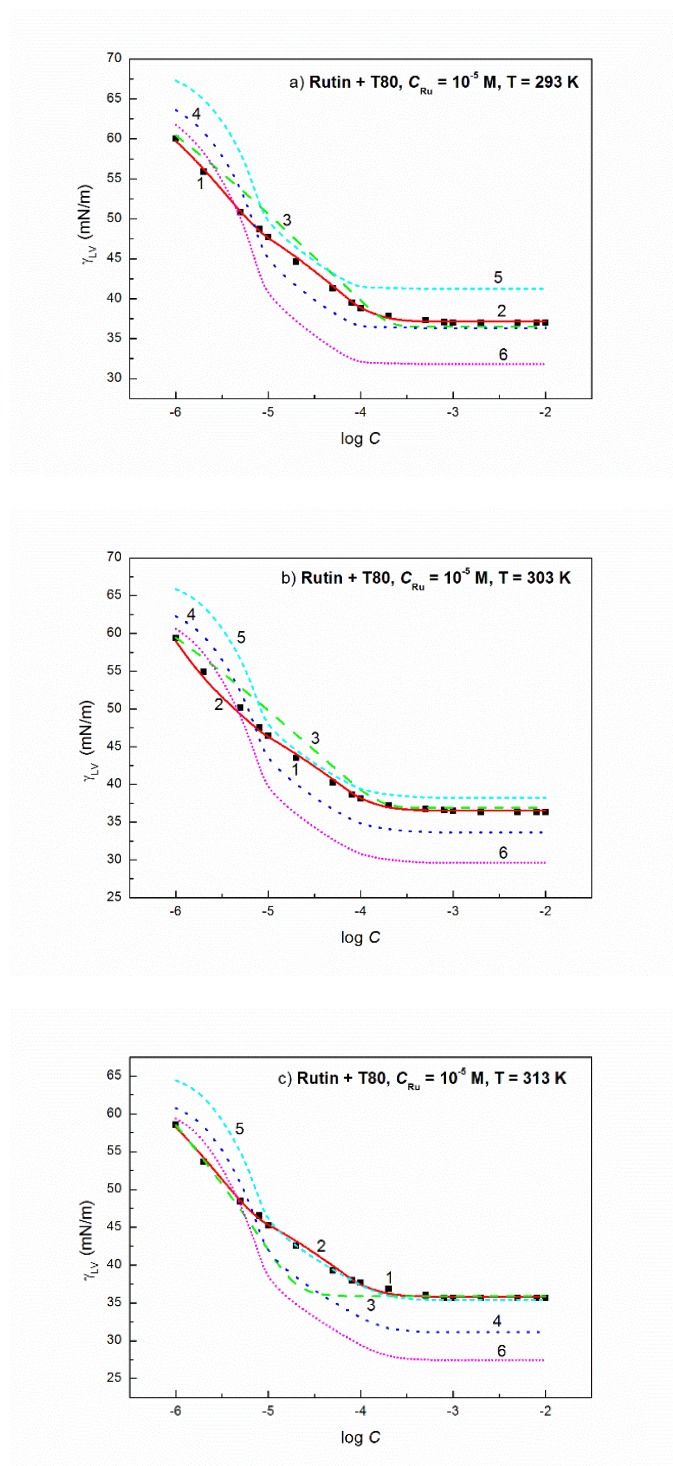

**Figure S8.** A plot of the surface tension ( $\gamma_{LV}$ ) of aqueous solutions of Ru + T80 at the constant Ru concentration equal to  $1 \times 10^{-5}$  M vs. the logarithm of T80 concentration ( $C$ ) at  $T = 293$  K (a), 303 K (b) and 313 K (c). Points 1 correspond to the measured values. Curves 2, 3, 4, 5 and 6 correspond to the values calculated from Eqs. (4), (2), (6), (7) and independent adsorption, respectively.

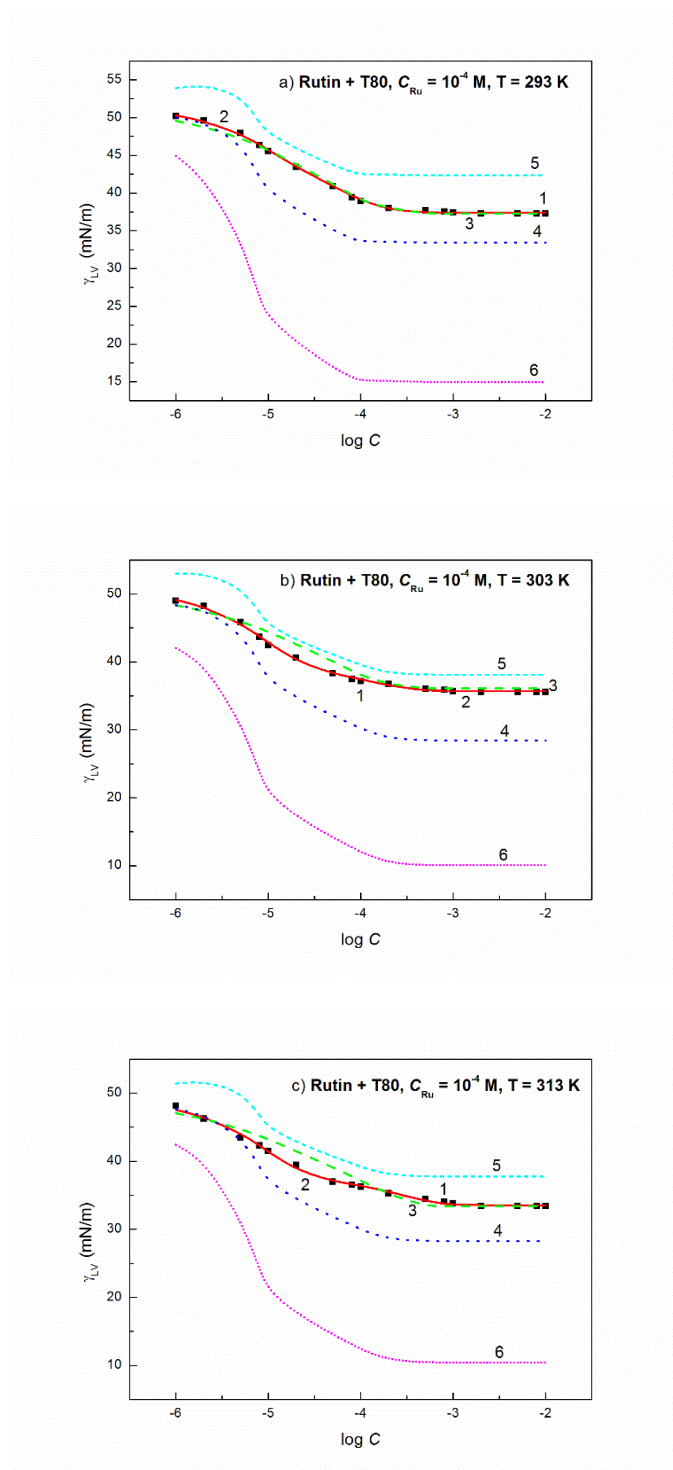

**Figure S9.** A plot of the surface tension ( $\gamma_{LV}$ ) of aqueous solutions of Ru + T80 at the constant Ru concentration equal to  $1 \times 10^{-4}$  M vs. the logarithm of T80 concentration ( $C$ ) at  $T = 293$  K (a),  $303$  K (b) and  $313$  K (c). Points 1 correspond to the measured values. Curves 2, 3, 4, 5 and 6 correspond to the values calculated from Eqs. (4), (2), (6), (7) and independent adsorption, respectively.

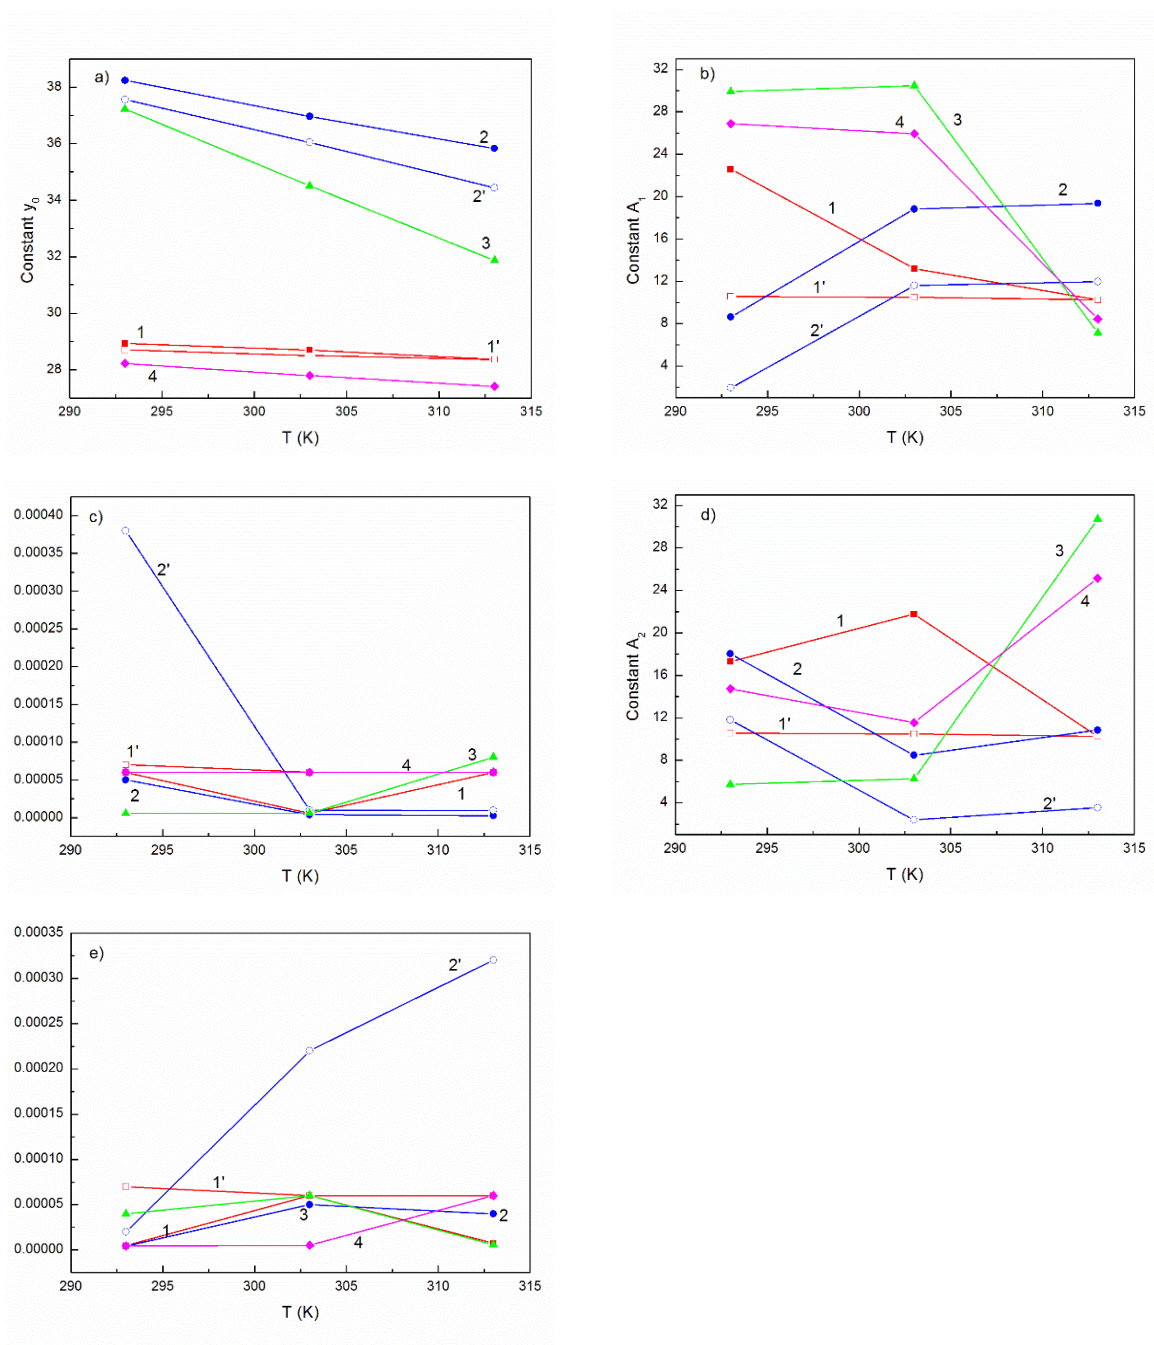

**Figure S10.** A plot of the constant  $y_0$  (a),  $A_1$  (b),  $t_1$  (c),  $A_2$  (d) and  $t_2$  (e) in Eq. (4) for the Q + TX114 (curves 1 and 1') and Q + T80 (curves 2 and 2'), T80 (curve 3) and TX114 (curve 4) vs. the temperature ( $T$ ). Curves 1 and 2 correspond to the constant flavonoid concentration equal to  $1 \times 10^{-5}$  M, curves 1' and 2' to the concentration equal to  $1 \times 10^{-4}$  M.

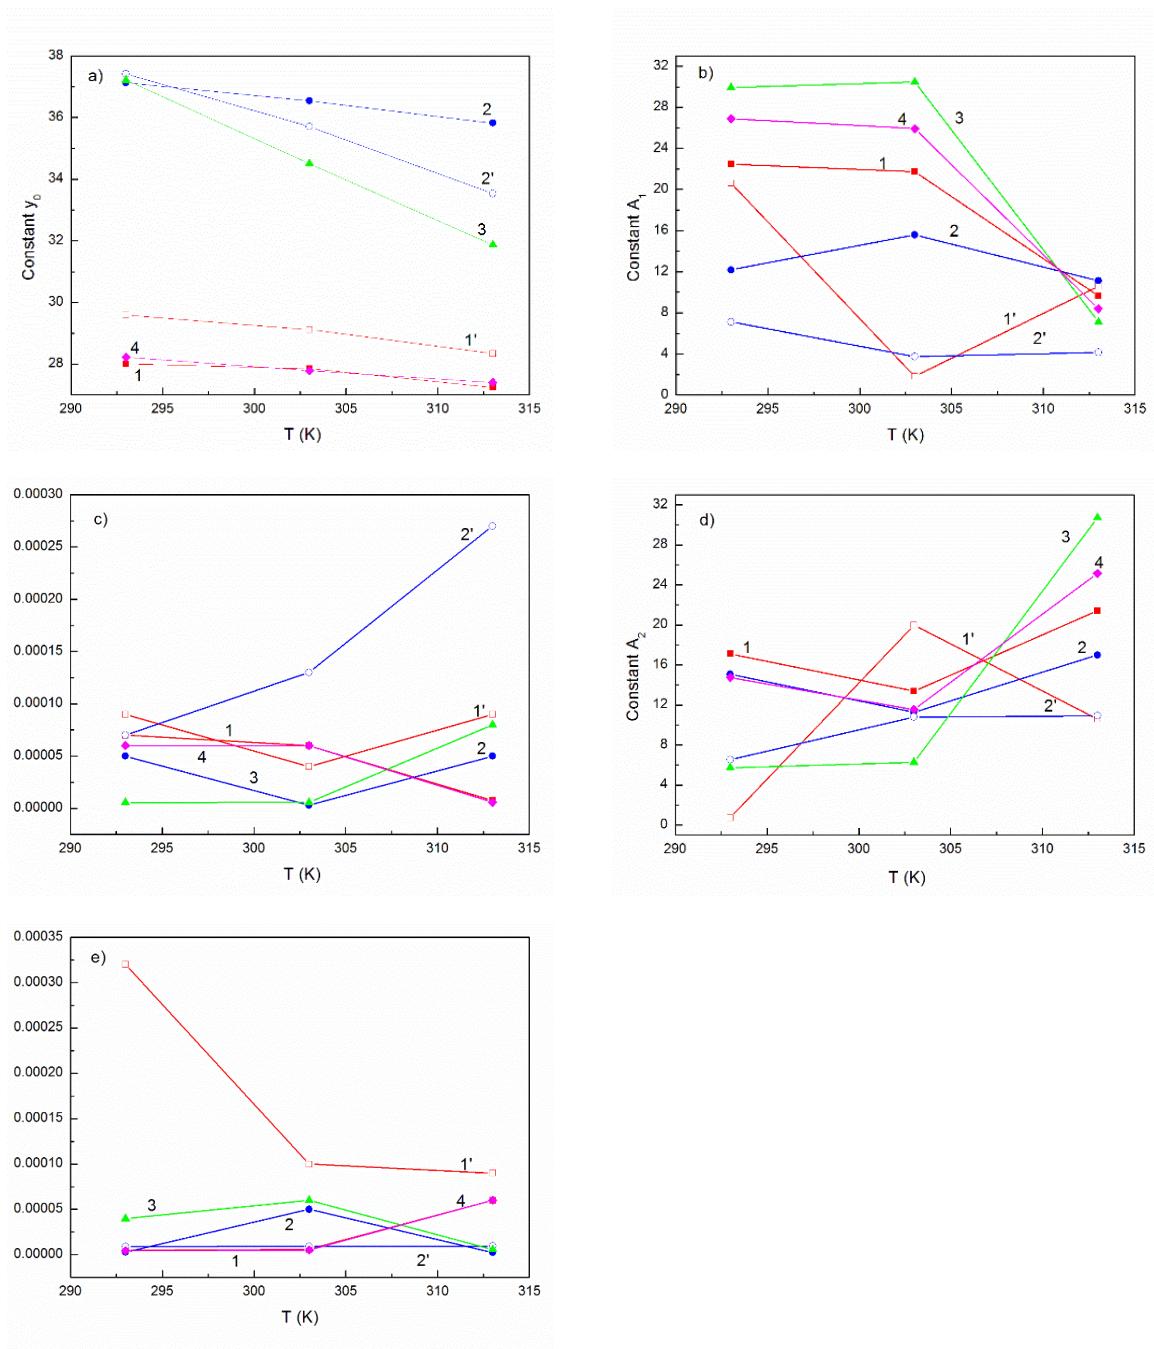

**Figure S11.** A plot of the constant  $y_0$  (a),  $A_1$  (b),  $t_1$  (c),  $A_2$  (d) and  $t_2$  (e) in Eq. (4) for the Ru + TX114 (curves 1 and 1') and Ru + T 80 (curves 2 and 2'), T80 (curve 3) and TX114 (curve 4) vs. the temperature (T). Curves 1 and 2 correspond to the constant flavonoid concentration equal to  $1 \times 10^{-5}$  M, curves 1' and 2' to the concentration equal to  $1 \times 10^{-4}$  M.

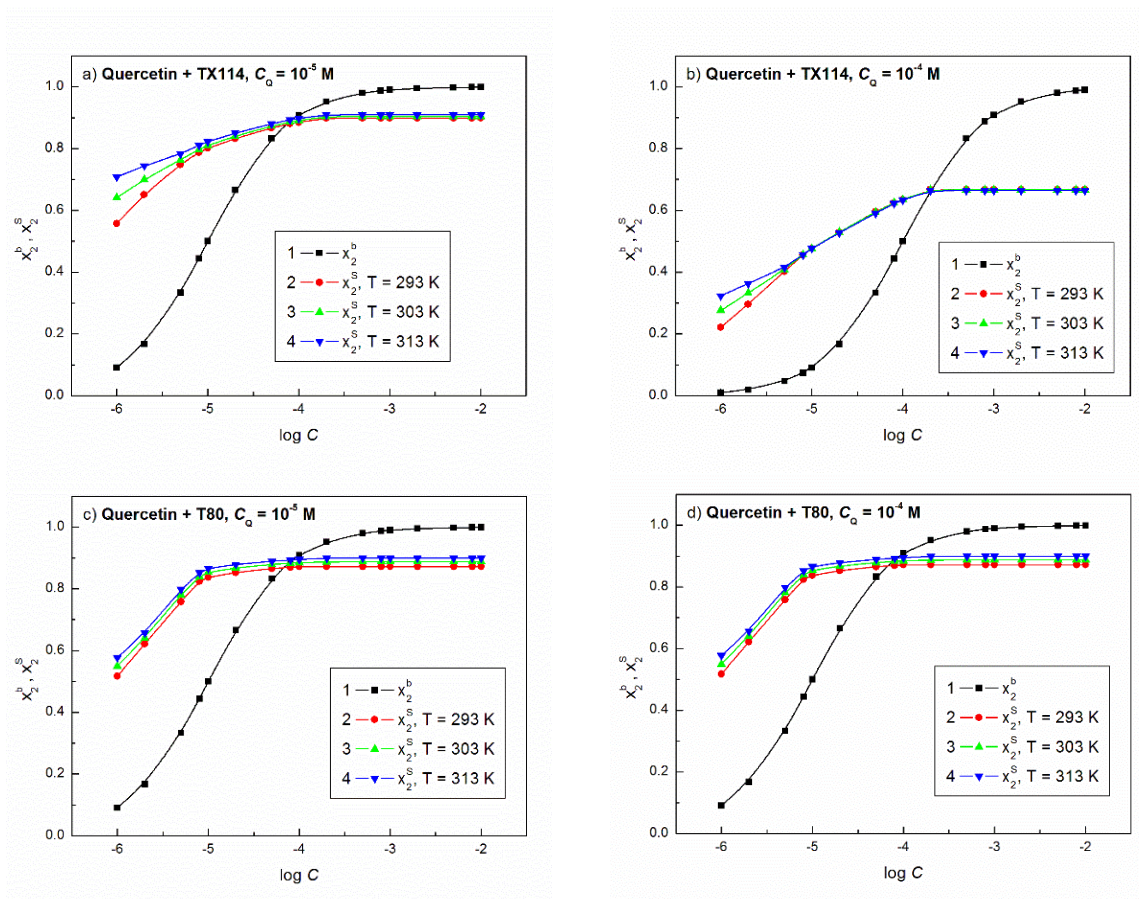

**Figure S12.** A plot of the values of  $x_2^b$  (curve 1) and  $x_2^s$  at temperature equal to 293 K (curve 2), 303 K (curve 3) and 313 K (curve 4) for aqueous solutions of Q + TX114 at the constant Q concentration equal to  $1 \times 10^{-5}$  M (a) and  $1 \times 10^{-4}$  M (b) as well as Q + T80 at the constant Q concentration equal to  $1 \times 10^{-5}$  M (c) and  $1 \times 10^{-4}$  M (d) vs. the logarithm of surfactant concentration ( $C$ ).

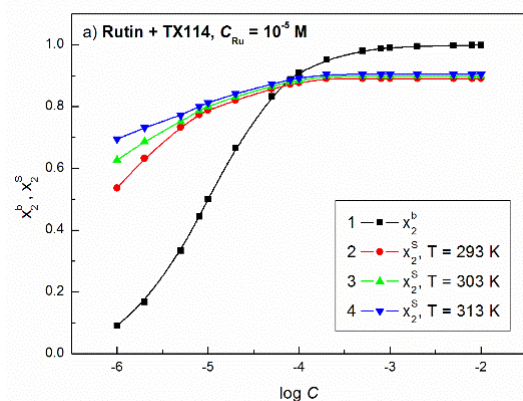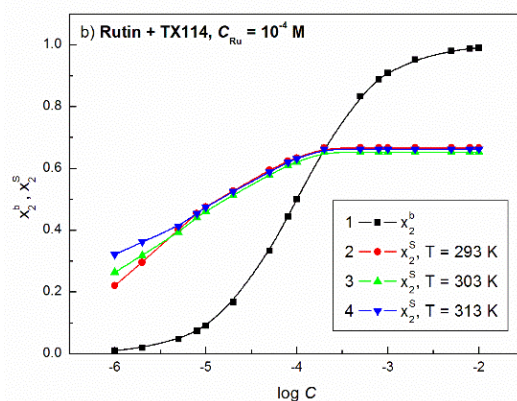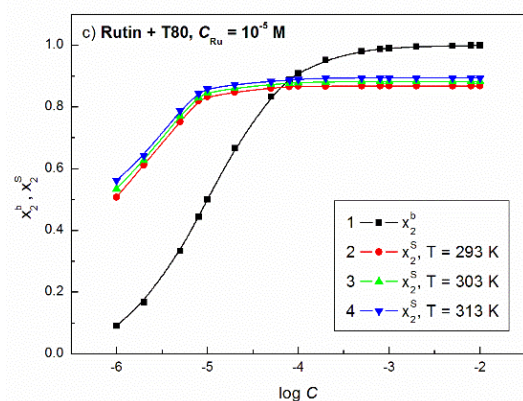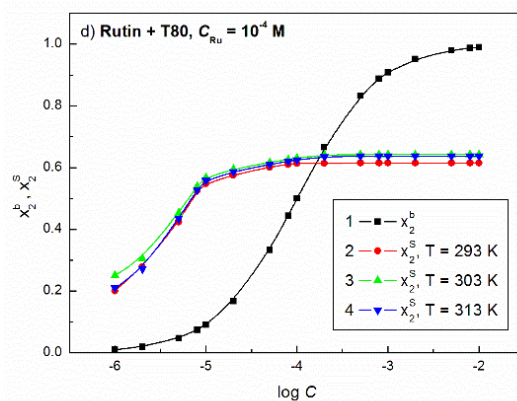

**Figure S13.** A plot of the values of  $x_2^b$  (curve 1) and  $x_2^s$  at temperature equal to 293 K (curve 2), 303 K (curve 3) and 313 K (curve 4) for aqueous solutions of Ru + TX114 at the constant Ru concentration equal to  $1 \times 10^{-5}$  M (a) and  $1 \times 10^{-4}$  M (b) as well as Ru + T80 at the constant Ru concentration equal to  $1 \times 10^{-5}$  M (c) and  $1 \times 10^{-4}$  M (d) vs. the logarithm of surfactant concentration ( $C$ ).

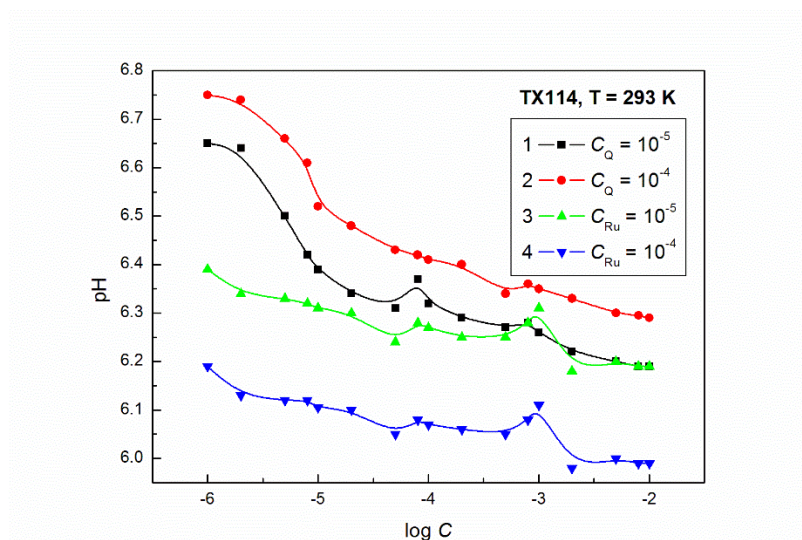

**Figure S14.** A plot of the values of pH of the aqueous solutions of TX114 with quercetin (curves 1 and 2) and rutin (curves 3 and 4) at temperature equal to 293 K vs. the logarithm of surfactant concentration ( $C$ ).

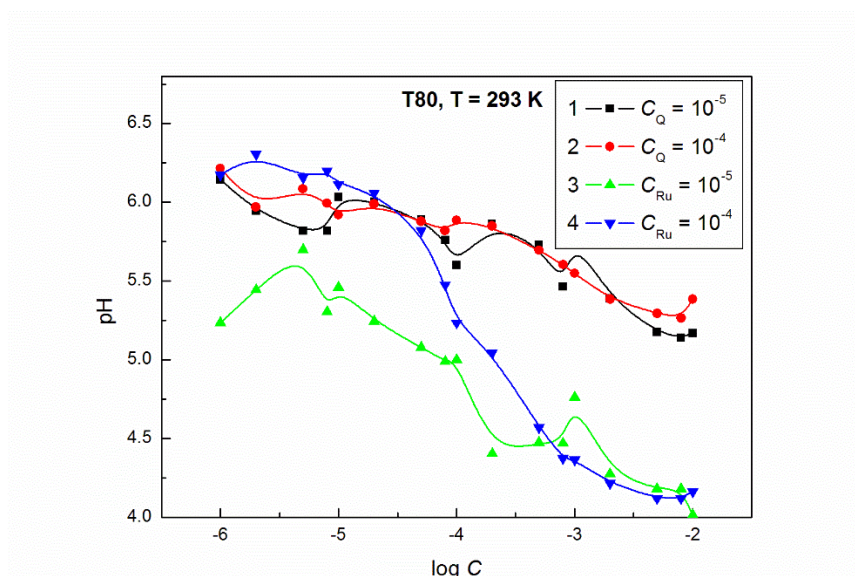

**Figure S15.** A plot of the values of pH of the aqueous solutions of T80 with quercetin (curves 1 and 2) and rutin (curves 3 and 4) at temperature equal to 293 K vs. the logarithm of surfactant concentration ( $C$ ).

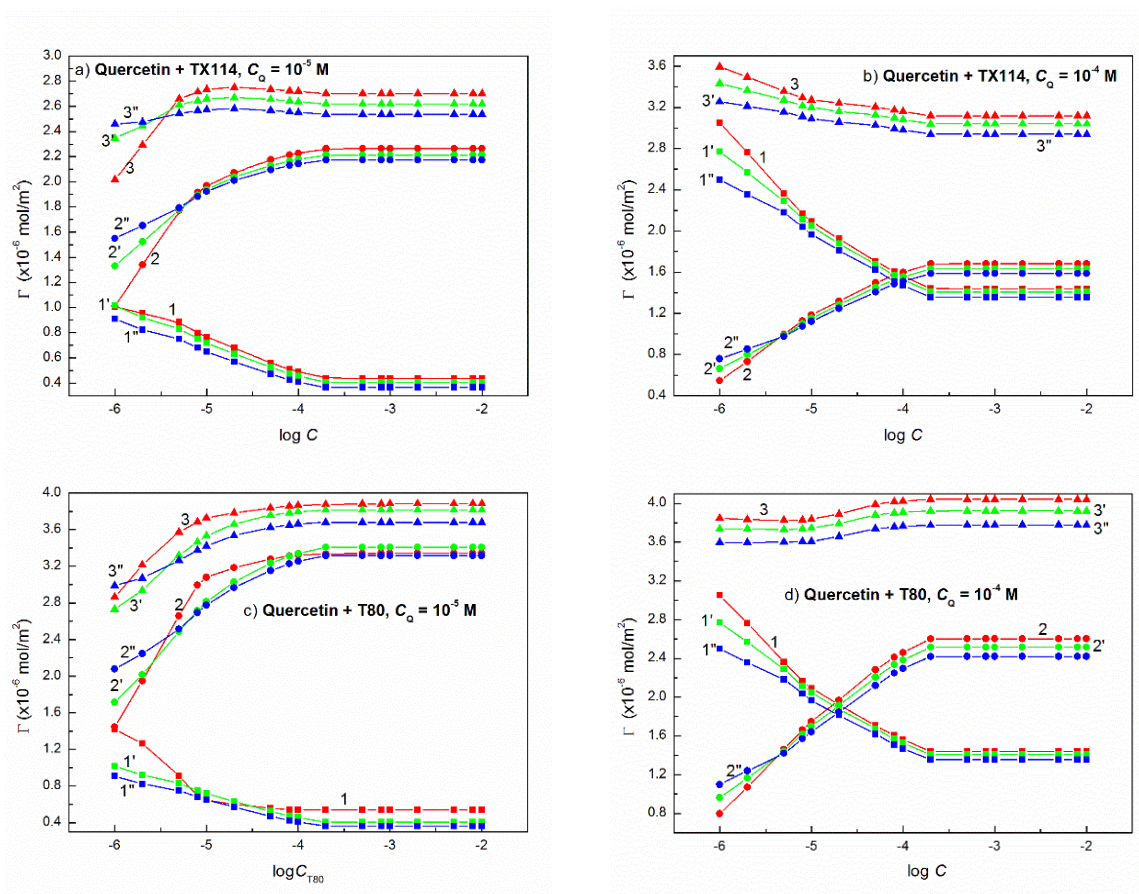

**Figure S16.** A plot of the surface concentration ( $\Gamma$ ) of Q (curves 1' and 1''), TX114/ T80 (curves 2, 2' and 2'') and the sum values for Q and TX114/T80 (curves 3, 3' and 3'') calculated from Eq. (9) vs. the logarithm of TX114/T80 concentration ( $C$ ) at the constant Q concentration equal to  $1 \times 10^{-5} \text{ M}$  ((a) and c)) and  $1 \times 10^{-4} \text{ M}$  ((b) and (d)). Curves 1, 2 and 3 correspond to temperature equal to 293 K. curves 1', 2' and 3' to 303 K and curves 1'', 2'' and 3'' to 313 K, respectively.

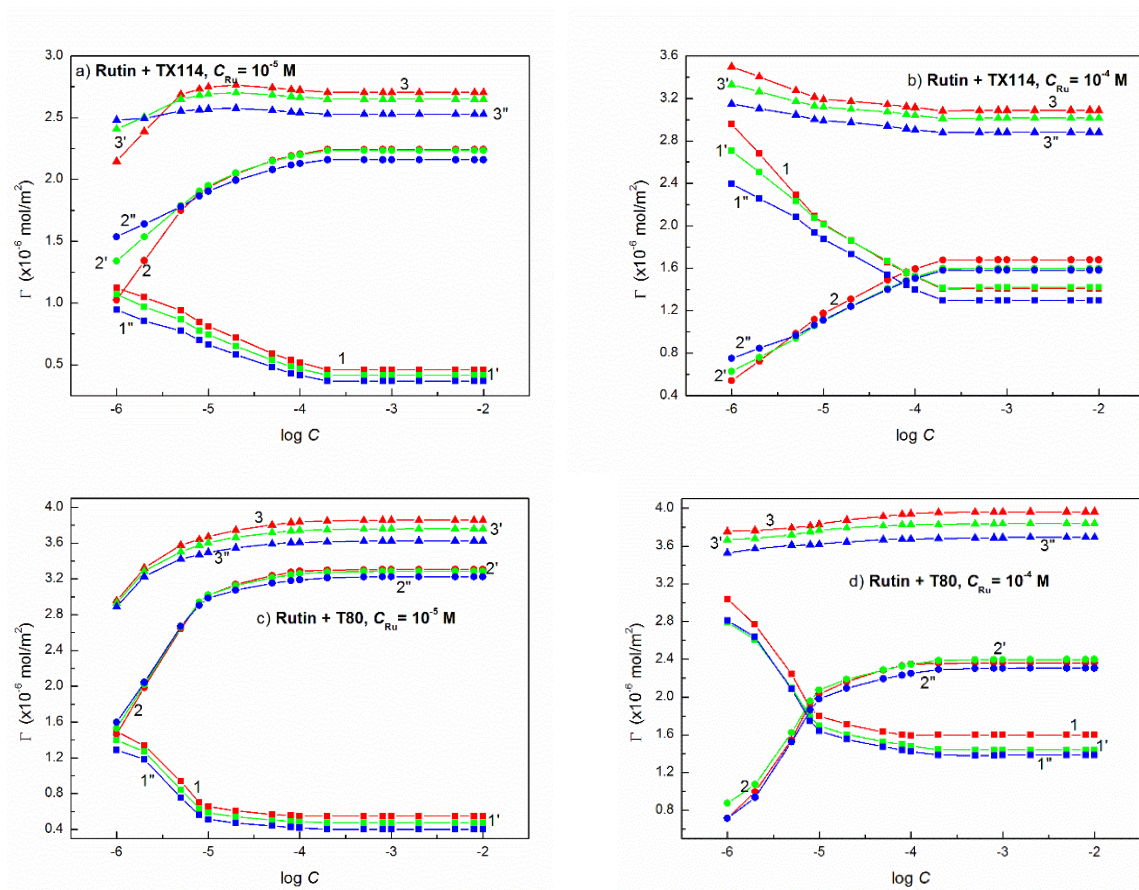

**Figure S17.** A plot of the surface concentration ( $\Gamma$ ) of Ru (curves 1' and 1''), TX114/ T80 (curves 2, 2' and 2'') and the sum values for Ru and TX114/T80 (curves 3, 3' and 3'') calculated from Eq. (9) vs. the logarithm of TX114/T80 concentration ( $C$ ) at the constant Ru concentration equal to  $1 \times 10^{-5} \text{ M}$  ((a) and c)) and  $1 \times 10^{-4} \text{ M}$  ((b) and (d)). Curves 1, 2 and 3 correspond to temperature equal to 293 K. curves 1', 2' and 3' to 303 K and curves 1'', 2'' and 3'' to 313 K, respectively.
